# Supplementary material
Source: PubMed Central journal article supplement (PMC7729846)
Supplement: mmc1.pdf [file mmc1.pdf]

**Instrumental Variable Analysis of the Safety of Etomidate in Patients with Heart Failure Undergoing Noncardiac Surgery**

Mabel Chung, MD, MPH; Peter Santer, MD, DPhil; Dana Raub, cand. med.; Yuansong Zhao, MA; Tianyi Zhao, MS; Jordan Strom, MD, MSc; Timothy Houle, PhD; Changyu Shen, PhD; Matthias Eikermann, MD, PhD; Robert W. Yeh, MD, MBA, MSc

**Supplemental Online Content**

**Table of Contents**

|                           |    |
|---------------------------|----|
| Supplemental Methods..... | 2  |
| Supplemental Tables.....  | 4  |
| Supplemental Figures..... | 16 |
| References.....           | 18 |

### **Supplemental Methods:**

#### *Hospital Registry Databases*

At Beth Israel Deaconess Medical Center (BIDMC), anaesthesia-related/intraoperative data were collected through the Anesthesia Information Management System (AIMS) and the Perioperative Information Management System (PIMS), admission/discharge information from the Admission Discharge Transfer (ADT) and Casemix databases, and Current Procedural Terminology (CPT) billing codes from the Center for Clinical Computing (CCC) database. Information regarding preoperative medication prescriptions was retrieved from the Online Medical Record (OMR) database, and mortality data were obtained from the Miscellaneous (MISC) database. At MGH, patient and perioperative data were collected from MetaVision, AIMS, and the Research Patient Data Registry (RPDR), and discharge information from Enterprise Performance Systems Inc (EPSi). Patient data was strictly deidentified and subsequently combined into one dataset from which the study cohort was created.

#### *Instrumental Variable Analysis: 2-Stage Regression and Validity*

Practitioner variability in etomidate use may be harnessed in an instrumental variable analysis to assess the effect of etomidate. This practice variation can be exploited as a natural experiment in which patients are pseudo-randomized to different likelihoods of receiving etomidate based on the preferences of their anesthesiologist. The instrumental variable approach may allow a more unbiased estimate of etomidate's effect compared with more traditional risk-adjustment or propensity score methods. In stage 1, we built a linear regression model predicting receipt of etomidate by the instrument, which tests the strength of the proportion of etomidate use as an instrumental variable. The outcome of this model is observed etomidate use (yes/no) and the primary predictor is the proportion of etomidate use by the anesthesiologist (continuous), allowing for the generation of predicted probabilities of the likelihood of receiving etomidate. The Wald F statistic was calculated to assess the strength of the instrument to predict observed etomidate use with an F statistic  $> 10$  indicating a strong instrument. The effectiveness of the instrument for balancing clinical characteristics was assessed by comparing characteristics across quartiles of increasing physician etomidate use.

In stage 2, a linear regression model was created with in-hospital or 30-day mortality as the outcome. Using the predicted values from stage 1 as the primary predictor, instrumental-variable-based absolute risk differences for the primary outcome measures were obtained from the coefficient of the instrumental variable. For both stages of the model, patient, procedural, and anesthesiologist variables in Table 1 (excluding ejection fraction, intraoperative agents, and service type) and hospital site were used for adjustment.

The validity of an instrumental variable analysis depends on the fulfillment of several assumptions.<sup>1-3</sup> The first is that the instrument should strongly predict the exposure of interest. In this case, the assumption is that a higher percentage of patients treated by high etomidate users will have received etomidate and that a lower percentage of patients treated by low etomidate users will have received etomidate. The second assumption is that the instrumental variable will effectively pseudo-randomize the patients creating balance between measured and unmeasured covariates. An indirect test of this assumption is to compare measured characteristics between quartiles of anesthesiologist use of etomidate with balanced proportions suggesting adequate pseudorandomization. Finally, a third assumption is that the instrument affects the outcome only through its association with the exposure, an assumption felt to be fundamentally untestable.<sup>2,4</sup> It is possible that links between receipt of etomidate and the outcome outside of physician preference may exist due to the institution (use or nonuse of etomidate determined by institution, institutions as a whole having better or worse outcomes in noncardiac surgery) or due to anesthesiologist experience or subspecialty training affecting both treatment preference and outcomes. To address these possibilities, we adjusted for institution and anesthesiologist experience in both stages of the instrumental variable analysis.

**Supplemental Table 1: ICD-9-CM and -10-CM Code Criteria to Define Heart Failure**

| Description                                                                                                                                                | ICD-9-CM               | ICD-10-CM |
|------------------------------------------------------------------------------------------------------------------------------------------------------------|------------------------|-----------|
| Rheumatic heart disease, unspecified                                                                                                                       | 398.91                 | I09.9x    |
| Hypertensive heart disease with heart failure                                                                                                              | 402.01, 402.11, 402.91 | I11.0x    |
| Hypertensive heart and chronic kidney disease with heart failure and stage 1 through stage 4 chronic kidney disease, or unspecified chronic kidney disease | 404.01, 404.11, 404.91 | I13.0x    |
| Hypertensive heart and chronic kidney disease with heart failure and with stage 5 chronic kidney disease, or end stage renal disease                       | 404.03, 404.13, 404.93 | I13.2x    |
| Ischemic cardiomyopathy                                                                                                                                    | --                     | I25.5x    |
| Dilated cardiomyopathy                                                                                                                                     | --                     | I42.0x    |
| Other restrictive cardiomyopathy                                                                                                                           | --                     | I42.5x    |
| Alcoholic cardiomyopathy                                                                                                                                   | 425.5                  | I42.6x    |
| Cardiomyopathy due to drug and external agent                                                                                                              | --                     | I42.7x    |
| Other cardiomyopathies                                                                                                                                     | 425.4                  | I42.8x    |
| Nutritional and metabolic cardiomyopathy                                                                                                                   | 425.7                  |           |
| Cardiomyopathy, unspecified                                                                                                                                | 425.9                  | I42.9x    |
| Cardiomyopathy in diseases classified elsewhere                                                                                                            | 425.8                  | I43.x     |
| Heart failure (LV/systolic/diastolic/combined/etc)                                                                                                         | 428.x                  | I50.x     |
| Neonatal cardiac failure                                                                                                                                   | --                     | P29.0x    |

**Supplemental Table 2: Medication Lists**

| Medication group                                                        | Specific agents                                                                                                                                                                                                    |
|-------------------------------------------------------------------------|--------------------------------------------------------------------------------------------------------------------------------------------------------------------------------------------------------------------|
| Angiotensin converting enzyme inhibitors, angiotensin receptor blockers | benazepril, captopril, enalapril, fosinopril, lisinopril, moexipril, peridonpril, quinapril, ramipril, trandolapril; azilsartan, candesartan, eprosartan, irbesartan, telmisartan, valsartan, losartan, olmesartan |
| Hydralazine/nitrates                                                    | hydralazine, isosorbide mononitrate, isosorbide dintrate, hydralazine and isosorbide dinitrate                                                                                                                     |
| Aldosterone antagonists                                                 | spironolactone, eplerenone                                                                                                                                                                                         |
| Anticoagulants                                                          | warfarin, phenprocoumon, dabigatran, rivaroxaban, apixaban, edoxaban, betrixaban                                                                                                                                   |
| Antiplatelets                                                           | acetylsalicylic acid, clopidogrel, ticagrelor, ticlodipine, prasugrel, dipyridamole, eptifibatide, cilostazol                                                                                                      |
| Steroids                                                                | prednisone, prednisolone, methylprednisolone, hydrocortisone, dexamethasone, cortisone acetate, betamethasone, fludrocortisone                                                                                     |

Steroids: at least 2 prescriptions in the 1 year prior to procedure. All other medication groups: prescription 30 days prior to procedure.

**Supplemental Table 3: Baseline Patient and Procedural Characteristics of Cases Stratified by Patients with Missing Values**

| Descriptor                                | Data Available<br>(N=19714) | Data Missing<br>(N=2200) | Standardized<br>Difference<br>(%) |
|-------------------------------------------|-----------------------------|--------------------------|-----------------------------------|
| <b>Patient Characteristics</b>            |                             |                          |                                   |
| Age, years – mean (range)                 | 67.5 (18-107)               | 68.2 (18-102)            | 4.8                               |
| Female sex – no. (%)                      | 8745 (44.4)                 | 956 (43.5)               | -1.8                              |
| Hypertension – no. (%)                    | 14792 (75.0)                | 1520 (69.1)              | -13.2                             |
| Hyperlipidemia – no. (%)                  | 11863 (60.2)                | 1119 (50.9)              | -18.8                             |
| Diabetes – no. (%)                        | 8182 (41.5)                 | 802 (36.5)               | -10.3                             |
| On insulin – no. (%)                      | 4472 (22.7)                 | 609 (27.7)               | 11.5                              |
| CAD – no. (%)                             | 10282 (52.2)                | 1125 (51.1)              | -2.2                              |
| Atrial Fibrillation – no. (%)             | 7789 (39.5)                 | 998 (45.4)               | 12.0                              |
| PVD – no. (%)                             | 3751 (19.0)                 | 405 (18.4)               | -1.5                              |
| Ischemic stroke – no. (%)                 | 1446 (7.3)                  | 259 (11.8)               | 15.4                              |
| COPD – no. (%)                            | 4636 (23.5)                 | 479 (21.8)               | -4.1                              |
| CKD – no. (%)                             | 6723 (34.1)                 | 704 (32.0)               | -4.5                              |
| CCI – median (IQR)                        | 5 (3, 7)                    | 4 (3,7)                  | -8.9                              |
| Smoking – no. (%)                         | 4589 (23.3)                 | 449 (20.4)               | -7.0                              |
| Beta blocker – no. (%)                    | 8193 (41.6)                 | 1260 (57.3)              | 31.8                              |
| ACE inhibitor/ARB – no. (%)               | 7357 (37.3)                 | 754 (34.3)               | -6.3                              |
| Hydralazine/nitrates – no. (%)            | 2698 (13.7)                 | 379 (17.2)               | 9.7                               |
| Aldosterone antagonists – no. (%)         | 1587 (8.1)                  | 209 (9.5)                | 4.9                               |
| Digoxin – no. (%)                         | 1498 (7.6)                  | 248 (11.3)               | 12.7                              |
| Steroid use – no. (%)                     | 3402 (17.3)                 | 387 (17.6)               | 0.8                               |
| Antiplatelet use – no. (%)                | 8611 (43.7)                 | 1011 (46.0)              | 4.6                               |
| Anticoagulant use – no. (%)               | 4802 (24.4)                 | 635 (28.9)               | 10.2                              |
| Ejection fraction – mean (SD)             | 55.6 (15.0)                 | 55.7 (16.5)              | 0.6                               |
| – no. (%)                                 |                             |                          |                                   |
| EF > 40%                                  | 7542 (38.3)                 | 926 (42.1)               | 7.8                               |
| EF 20-40%                                 | 1602 (8.1)                  | 208 (9.5)                | 4.9                               |
| EF < 20%                                  | 117 (0.60)                  | 28 (1.3)                 | 7.2                               |
| Missing                                   | 10,453 (53.0)               | 1038 (47.2)              | -11.6                             |
| <b>Procedural characteristics</b>         |                             |                          |                                   |
| Intraoperative etomidate used – no. (%)   | 2821 (14.3)                 | 322 (14.6)               | 0.9                               |
| <b>Intraoperative agent use – no. (%)</b> |                             |                          |                                   |
| Etomidate only                            | 1244 (6.3)                  | 153 (7.0)                | 2.8                               |
| Propofol only                             | 15539 (78.8)                | 1738 (79.0)              | 0.5                               |
| Ketamine only                             | 30 (0.2)                    | 5 (0.2)                  | 0                                 |
| Etomidate and propofol                    | 1508 (7.6)                  | 161 (7.3)                | -1.1                              |
| Etomidate and ketamine                    | 27 (0.1)                    | 4 (0.2)                  | 2.6                               |
| Propofol and ketamine                     | 791 (4.0)                   | 48 (2.2)                 | -10.4                             |
| All three                                 | 42 (0.2)                    | 4 (0.2)                  | 0                                 |
| No agent                                  | 533 (2.7)                   | 87 (4.0)                 | 7.2                               |
| Propofol (total)                          | 17880 (90.7)                | 1951 (88.7)              | -6.6                              |
| Ketamine (total)                          | 890 (4.5)                   | 61 (2.8)                 | -9.1                              |
| Neuraxial anaesthesia – no. (%)           | 793 (4.0)                   | 74 (3.4)                 | -3.2                              |
| Age adjusted MAC – mean (SD)              | 0.84 (0.35)                 | 0.77 (0.34)              | -20.3                             |

|                                                                               |                      |                      |       |
|-------------------------------------------------------------------------------|----------------------|----------------------|-------|
| Total fluid volume <sup>a</sup> – median (IQR)                                | 1703<br>(900, 3000)  | 1250<br>(750, 2402)  | -19.2 |
| Estimated blood loss, mL – median (IQR)                                       | 0 (0, 50)            | 0 (0, 100)           | 2.9   |
| Urine output, mL – median (IQR)                                               | 0 (0, 200)           | 0 (0, 300)           | 16.7  |
| PRBC units – median (IQR)                                                     | 0 (0, 0)             | 0 (0, 0)             | 4.2   |
| Total vasopressors, mg norepinephrine equivalents <sup>b</sup> – median (IQR) | 0.10<br>(0.01, 0.40) | 0.12<br>(0.01, 0.44) | 3.2   |
| Service – no. (%)                                                             |                      |                      |       |
| Orthopedic Surgery                                                            | 3818 (19.4)          | 311 (14.1)           | -14.2 |
| Vascular Surgery                                                              | 2449 (12.4)          | 263 (12.0)           | -1.2  |
| Thoracic Surgery                                                              | 2186 (11.1)          | 189 (8.6)            | -8.4  |
| Urology                                                                       | 1560 (7.9)           | 120 (5.5)            | -9.6  |
| General Surgery                                                               | 1378 (7.0)           | 147 (6.7)            | -1.2  |
| Anesthesiology                                                                | 1233 (6.3)           | 317 (14.4)           | 26.8  |
| Neurosurgery                                                                  | 1172 (6.0)           | 177 (8.1)            | 8.2   |
| Transplant                                                                    | 1063 (5.4)           | 76 (3.5)             | -9.2  |
| Acute Care Surgery                                                            | 991 (5.0)            | 181 (8.2)            | 12.9  |
| Gynecology                                                                    | 490 (2.5)            | 31 (1.4)             | -8.0  |
| Surgical Oncology                                                             | 437 (2.2)            | 21 (1.0)             | -9.6  |
| Plastic Surgery                                                               | 336 (1.7)            | 30 (1.4)             | -2.4  |
| Radiology                                                                     | 241 (1.2)            | 58 (2.6)             | 10.3  |
| ENT                                                                           | 207 (1.1)            | 12 (0.6)             | -5.4  |
| Colorectal                                                                    | 159 (0.8)            | 4 (0.2)              | -8.5  |
| Burn                                                                          | 134 (0.7)            | 29 (1.3)             | 6.0   |
| Other                                                                         | 579 (2.9)            | 113 (5.1)            | 11.2  |
| Missing                                                                       | 1281 (6.5)           | 121 (5.5)            | -4.2  |

<sup>a</sup>Total fluid volume defined as the volumes of crystalloid plus one-and-a-half times colloid administered intraoperative exclusive of PRBCs. BMI, body mass index; ASA, American Society of Anesthesiologists; CAD, coronary artery disease; PVD, peripheral vascular disease; COPD, chronic obstructive pulmonary disease; CKD, chronic kidney disease; CCI, Charlson Comorbidity Index; ACE, angiotensin converting enzyme; ARB, angiotensin receptor blocker; MAC, minimal alveolar concentration; PRBC, packed red blood cells; RVU, relative value unit of main procedure. All comorbidities are within 1 year of procedure date. All medications are prescriptions within 30 days of procedure except steroids (1 year prior).

<sup>b</sup>Vasopressors in milligrams norepinephrine equivalents = total amount epinephrine + total amount norepinephrine + (total amount phenylephrine / 10) + (total amount dopamine / weight in kilograms / 2).

**Supplemental Table 4: Anaesthesiologist Case Volume Stratified by Patients with Missing Values**

| Descriptor                               | Data Available<br>(N=294) | Data Missing<br>(N=270) | Standardized<br>Difference<br>(%) |
|------------------------------------------|---------------------------|-------------------------|-----------------------------------|
| HF cases – median (IQR)                  | 51<br>(23, 112)           | 57<br>(28, 117)         | 6.6                               |
| Total institutional cases – median (IQR) | 908<br>(433, 2041)        | 945<br>(466, 2198)      | 4.8                               |



**Supplemental Table 5: Sensitivity Analyses**

| Outcomes                                                                                     | Adjusted Instrumental Variable Analysis <sup>a</sup> |         |
|----------------------------------------------------------------------------------------------|------------------------------------------------------|---------|
|                                                                                              | RD<br>(95% CI)                                       | P value |
| <b>Primary Outcomes from Original Instrumental Variable Cohort (from Table 3) (N=19,714)</b> |                                                      |         |
| In-Hospital Mortality, %                                                                     | -0.2<br>(-2.4 to 1.9)                                | 0.83    |
| 30-day Mortality, %                                                                          | 0.2<br>(-2.5 to 2.9)                                 | 0.90    |
| <b>Study Population Excluding Covariates with Missing Values<sup>b</sup> (N=21,914)</b>      |                                                      |         |
| In-Hospital Mortality, %                                                                     | 0.8<br>(-1.4 to 2.9)                                 | 0.49    |
| 30-day Mortality, %                                                                          | 1.2<br>(-1.5 to 3.8)                                 | 0.39    |
| <b>Original Instrumental Variable Cohort + EF (Categorical) (N=19,714)</b>                   |                                                      |         |
| In-Hospital Mortality, %                                                                     | -0.3<br>(-2.4 to 1.9)                                | 0.79    |
| 30-day Mortality, %                                                                          | 0.04<br>(-2.7 to 2.7)                                | 0.98    |
| <b>Ejection Fraction ≤ 40% (N=1719)</b>                                                      |                                                      |         |
| In-Hospital Mortality, %                                                                     | 0.9<br>(-5.6 to 7.4)                                 | 0.79    |
| 30-day Mortality, %                                                                          | 3.6<br>(-4.6 to 11.7)                                | 0.39    |
| <b>Systolic Heart Failure<sup>c</sup> + Beta Blocker + ACEi/ARB (N=2042)</b>                 |                                                      |         |
| In-Hospital Mortality, %                                                                     | -2.0<br>(-7.4 to 3.4)                                | 0.47    |
| 30-day Mortality, %                                                                          | -2.8<br>(-9.8 to 4.1)                                | 0.42    |
| <b>Years 2012-2017 (N=10,271)</b>                                                            |                                                      |         |
| In-Hospital Mortality, %                                                                     | 1.9<br>(-2.5 to 6.4)                                 | 0.41    |
| 30-day Mortality, %                                                                          | 2.3<br>(-3.1 to 7.8)                                 | 0.40    |

<sup>a</sup>Adjusted instrumental variable model includes hospital site and all covariates in Table 1 except ejection fraction, intraoperative agents, estimated blood loss, urine output, vasopressors, and service type.

<sup>b</sup>Covariates included body mass index, emergent status, admission type, duration of surgery, work relative value units, and American Society of Anesthesiologists status. <sup>c</sup>ICD-9 428.2x (systolic heart failure) and 428.4x (combined systolic/diastolic heart failure) and ICD-10: I50.2x (systolic heart failure) and I50.4x (combined systolic/diastolic heart failure). CI, confidence interval; RD, risk difference; ACEi, angiotensin converting enzyme inhibitor; ARB, angiotensin receptor blocker.

**Supplemental Table 6: Baseline Patient and Procedural Characteristics of Cases Stratified by Patients with Available and Missing EF values**

| Descriptor                                | EF Data Available (N=9261) | EF Data Missing (N=10453) | Standardized Difference (%) |
|-------------------------------------------|----------------------------|---------------------------|-----------------------------|
| <b>Patient Characteristics</b>            |                            |                           |                             |
| Age, years – mean ± SD                    | 66.4 (18-104)              | 68.4 (18-107)             | 14.2                        |
| BMI, kg m <sup>-2</sup> – mean (SD)       | 29.2 (7.8)                 | 29.8 (7.8)                | 7.7                         |
| Female sex – no. (%)                      | 3991 (43.1)                | 4754 (45.5)               | 4.8                         |
| ASA status – median (IQR)                 | 3 (3,3)                    | 3 (3,3)                   | -10.3                       |
| Hypertension – no. (%)                    | 7204 (77.8)                | 7588 (72.6)               | -12.1                       |
| Hyperlipidemia – no. (%)                  | 5744 (62.0)                | 6119 (58.5)               | -7.2                        |
| Diabetes – no. (%)                        | 3789 (40.9)                | 4393 (42.0)               | 2.2                         |
| On insulin – no. (%)                      | 2613 (28.2)                | 1859 (17.8)               | -24.9                       |
| CAD – no. (%)                             | 5173 (55.9)                | 5109 (48.9)               | -14.1                       |
| Atrial Fibrillation – no. (%)             | 3908 (42.2)                | 3881 (37.1)               | -10.4                       |
| PVD – no. (%)                             | 1857 (20.1)                | 1894 (18.1)               | -5.1                        |
| Ischemic stroke – no. (%)                 | 969 (10.5)                 | 477 (4.6)                 | -22.5                       |
| COPD – no. (%)                            | 2209 (23.9)                | 2427 (23.2)               | -1.7                        |
| CKD – no. (%)                             | 3417 (36.9)                | 3306 (31.6)               | -11.2                       |
| CCI – median (IQR)                        | 5 (3,8)                    | 4 (3,7)                   | -23.4                       |
| Smoking – no. (%)                         | 2262 (24.4)                | 2327 (22.3)               | -5.0                        |
| Beta blocker – no. (%)                    | 4325 (46.7)                | 3868 (37.0)               | -19.8                       |
| ACE inhibitor/ARB – no. (%)               | 3850 (41.6)                | 3507 (33.6)               | -16.6                       |
| Hydralazine/nitrates – no. (%)            | 1632 (17.6)                | 1066 (10.2)               | -21.5                       |
| Aldosterone antagonists – no. (%)         | 928 (10.0)                 | 659 (6.3)                 | -13.6                       |
| Digoxin – no. (%)                         | 910 (9.8)                  | 588 (5.6)                 | -15.8                       |
| Steroid use – no. (%)                     | 2163 (23.4)                | 1239 (11.9)               | -30.5                       |
| Antiplatelet use – no. (%)                | 4801 (51.8)                | 3810 (36.5)               | -31.2                       |
| Anticoagulant use – no. (%)               | 2672 (28.9)                | 2130 (20.4)               | -19.8                       |
| <b>Procedural characteristics</b>         |                            |                           |                             |
| Intraoperative etomidate used – no. (%)   | 1321 (14.3)                | 1500 (14.4)               | 0.3                         |
| <b>Intraoperative agent use – no. (%)</b> |                            |                           |                             |
| Etomidate only                            | 586 (6.3)                  | 658 (6.3)                 | 0                           |
| Propofol only                             | 7312 (79.0)                | 8227 (78.7)               | -0.7                        |
| Ketamine only                             | 15 (0.2)                   | 15 (0.1)                  | -2.6                        |
| Etomidate and propofol                    | 709 (7.7)                  | 799 (7.6)                 | -0.4                        |
| Etomidate and ketamine                    | 9 (0.1)                    | 18 (0.2)                  | 2.6                         |
| Propofol and ketamine                     | 358 (3.9)                  | 433 (4.1)                 | 1.0                         |
| All three                                 | 17 (0.2)                   | 25 (0.2)                  | 0                           |
| No agent                                  | 255 (2.8)                  | 278 (2.7)                 | -0.6                        |
| Propofol (total)                          | 8396 (90.7)                | 9484 (90.7)               | 0                           |
| Ketamine (total)                          | 399 (4.3)                  | 491 (4.7)                 | 1.9                         |
| Emergency status – no. (%)                | 713 (7.7)                  | 951 (9.1)                 | 5.1                         |
| <b>Admission type – no. (%)</b>           |                            |                           |                             |
| Ambulatory                                | 1193 (12.9)                | 1619 (15.5)               | 7.5                         |
| Same day Admit                            | 3657 (39.5)                | 5203 (49.8)               | 20.8                        |
| Inpatient                                 | 4411 (47.6)                | 3631 (34.7)               | -26.4                       |
| Neuraxial anaesthesia – no. (%)           | 375 (4.1)                  | 418 (4.0)                 | -0.5                        |
| Age adjusted MAC – mean (SD)              | 0.81 (0.34)                | 0.85 (0.35)               | 11.6                        |

|                                                                               |                      |                      |       |
|-------------------------------------------------------------------------------|----------------------|----------------------|-------|
| Total fluid volume <sup>a</sup> – median (IQR)                                | 1500<br>(750,2700)   | 1800<br>(1000, 3067) | 13.8  |
| Estimated blood loss, mL – median (IQR)                                       | 0 (0,50)             | 0 (0,50)             | 2.2   |
| Urine output, mL – median (IQR)                                               | 0 (0, 200)           | 0 (0, 165)           | -5.4  |
| PRBC units – mean (SD)                                                        | 0.17 (0.81)          | 0.19 (0.81)          | -2.5  |
| Total vasopressors, mg norepinephrine equivalents <sup>b</sup> – median (IQR) | 0.11<br>(0.01, 0.42) | 0.09<br>(0.01, 0.39) | 0     |
| Duration of surgery, min – mean (SD)                                          | 166.4 (110.5)        | 169.1 (110.3)        | 2.5   |
| Work RVU – median (IQR)                                                       | 13.5<br>(7.2, 20.1)  | 15.3<br>(7.8,21.8)   | 9.3   |
| Service – no. (%)                                                             |                      |                      |       |
| Orthopedic Surgery                                                            | 1527 (16.5)          | 2291 (21.9)          | 13.7  |
| Vascular Surgery                                                              | 1089 (11.8)          | 1360 (13.0)          | 3.6   |
| Thoracic Surgery                                                              | 1074 (11.6)          | 1112 (10.6)          | -3.2  |
| Urology                                                                       | 669 (7.2)            | 891 (8.5)            | 4.8   |
| General Surgery                                                               | 722 (7.8)            | 656 (6.3)            | -5.9  |
| Anesthesiology                                                                | 758 (8.2)            | 475 (4.5)            | -15.2 |
| Neurosurgery                                                                  | 529 (5.7)            | 643 (6.2)            | 2.1   |
| Transplant                                                                    | 545 (5.9)            | 518 (5.0)            | -4.0  |
| Acute Care Surgery                                                            | 561 (6.1)            | 430 (4.1)            | -9.1  |
| Gynecology                                                                    | 197 (2.1)            | 293 (2.8)            | 4.5   |
| Surgical Oncology                                                             | 202 (2.2)            | 235 (2.3)            | 0.7   |
| Plastic Surgery                                                               | 152 (1.6)            | 184 (1.8)            | 1.6   |
| Radiology                                                                     | 155 (1.7)            | 86 (0.8)             | -8.1  |
| ENT                                                                           | 80 (0.9)             | 127 (1.2)            | 2.9   |
| Colorectal                                                                    | 66 (0.7)             | 93 (0.9)             | 2.3   |
| Burn                                                                          | 68 (0.7)             | 66 (0.6)             | -1.2  |
| Other                                                                         | 312 (3.4)            | 267 (2.6)            | -4.7  |
| Missing                                                                       | 555 (6.0)            | 726 (7.0)            | 4.1   |

<sup>a</sup>Total fluid volume defined as the volumes of crystalloid plus one-and-a-half times colloid administered intraoperative exclusive of PRBCs. BMI, body mass index; ASA, American Society of Anesthesiologists; CAD, coronary artery disease; PVD, peripheral vascular disease; COPD, chronic obstructive pulmonary disease; CKD, chronic kidney disease; CCI, Charlson Comorbidity Index; ACE, angiotensin converting enzyme; ARB, angiotensin receptor blocker; MAC, minimal alveolar concentration; PRBC, packed red blood cells; RVU, relative value unit of main procedure. All comorbidities are within 1 year of procedure date. All medications are prescriptions within 30 days of procedure except steroids (1 year prior).

<sup>b</sup>Vasopressors in milligrams norepinephrine equivalents = total amount epinephrine + total amount norepinephrine + (total amount phenylephrine / 10) + (total amount dopamine / weight in kilograms / 2).

**Supplemental Table 7: Anaesthesiologist Case Volume Stratified by Patients with Available and Missing EF values**

| Descriptor                               | EF Data Available<br>(N=141) | EF Data Missing<br>(N=153) | Standardized Difference (%) |
|------------------------------------------|------------------------------|----------------------------|-----------------------------|
| HF cases – median (IQR)                  | 59<br>(27, 119)              | 47<br>(21, 88)             | -25.2                       |
| Total institutional cases – median (IQR) | 942<br>(483, 2346)           | 857<br>(385, 1721)         | -7.7                        |

**Supplemental Table 8: Anaesthesiologist Preference for Etomidate Use Over Time**

| Years                        | 2007-09<br>N=168 | 2010-11<br>N=172 | 2012-13<br>N=203 | 2014-15<br>N=210 |
|------------------------------|------------------|------------------|------------------|------------------|
| Heart Failure Cases – no.    | 4927             | 3767             | 4169             | 4526             |
| Preference for etomidate - % |                  |                  |                  |                  |
| Median (IQR)                 | 13.3 (6.2, 26.7) | 10.7 (4.7, 20.0) | 8.1 (4.1, 16.3)  | 8.0 (3.8, 15.5)  |
| Range                        | 0-66.7           | 0-55.8           | 0-55.8           | 0-50.0           |

**Supplemental Table 9: Anaesthesiologist Case Volume Stratified by Etomidate Use**

| Descriptor                                  | Total<br>(N=294)   | Etomidate Never<br>Used in HF cases<br>(N=46) | Etomidate Used in<br>≥1 HF Case<br>(N=248) | Standardized<br>Difference<br>(%) |
|---------------------------------------------|--------------------|-----------------------------------------------|--------------------------------------------|-----------------------------------|
| HF cases – median (IQR)<br>(from Table 2)   | 51<br>(23, 112)    | 21<br>(12, 36)                                | 61<br>(29, 119)                            | 94.2                              |
| Total institutional cases –<br>median (IQR) | 908<br>(433, 2041) | 395<br>(189, 700)                             | 1034<br>(556, 2335)                        | 92.9                              |

**Supplemental Table 10: Anaesthesiologist Case Volume Stratified by Groups of Increasing Anaesthesiologist Etomidate Use**

| Descriptor                               | Etomidate Use by Anaesthesiologist (%) |                                       |                                        |                                       |
|------------------------------------------|----------------------------------------|---------------------------------------|----------------------------------------|---------------------------------------|
|                                          | Quartile 1<br>0 to 4.7<br>(N=86)       | Quartile 2<br>> 4.7 to 11.1<br>(N=80) | Quartile 3<br>> 11.1 to 20.4<br>(N=68) | Quartile 4<br>>20.4 to 66.7<br>(N=60) |
| HF cases – median (IQR) (from Table 4)   | 36<br>(19, 69)                         | 51<br>(22,92)                         | 66<br>(25, 132)                        | 64<br>(35, 126)                       |
| Total institutional cases – median (IQR) | 685<br>(350, 1156)                     | 875<br>(423, 1845)                    | 868<br>(382, 2689)                     | 1480<br>(896, 3122)                   |

**Supplemental Figure 1: Consort Diagram of Patient Selection for the Primary Analysis.**

Flow chart depicting inclusion and exclusion criteria. HF, heart failure; MGH, Massachusetts General Hospital; BIDMC, Beth Israel Deaconess Medical Center; BMI, body mass index; ASA, American Society of Anesthesiologists; RVU, relative value units.

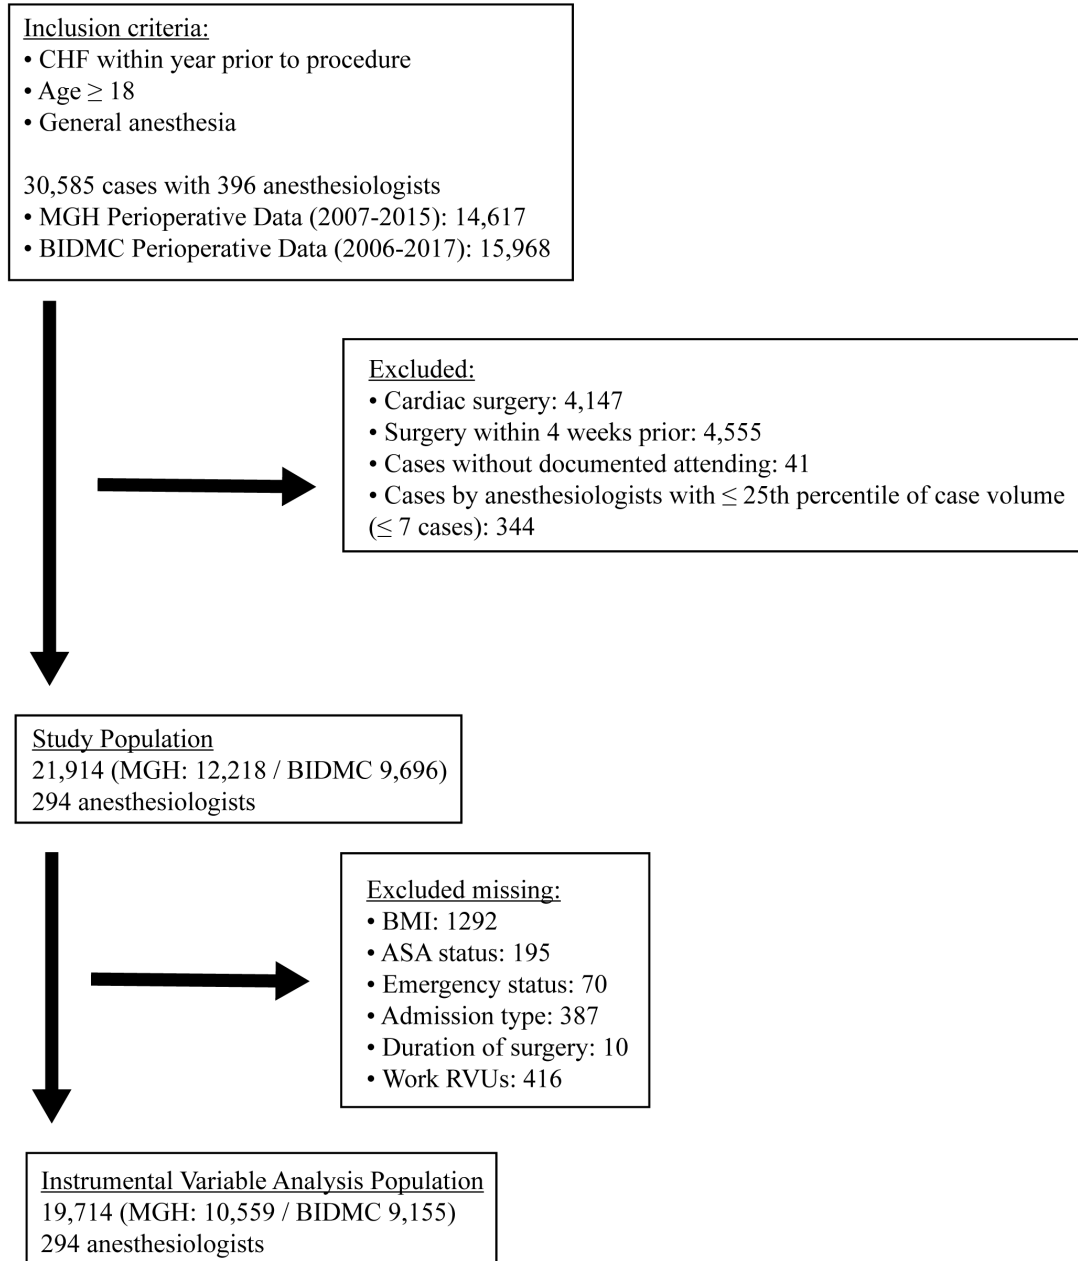



**Supplemental Figure 2: Anaesthesiologist Use of Etomidate with Heart Failure Patients in Noncardiac Cases from 2007-2015.** Proportion of noncardiac cases among individual attending anaesthesiologists in which etomidate was used over time.

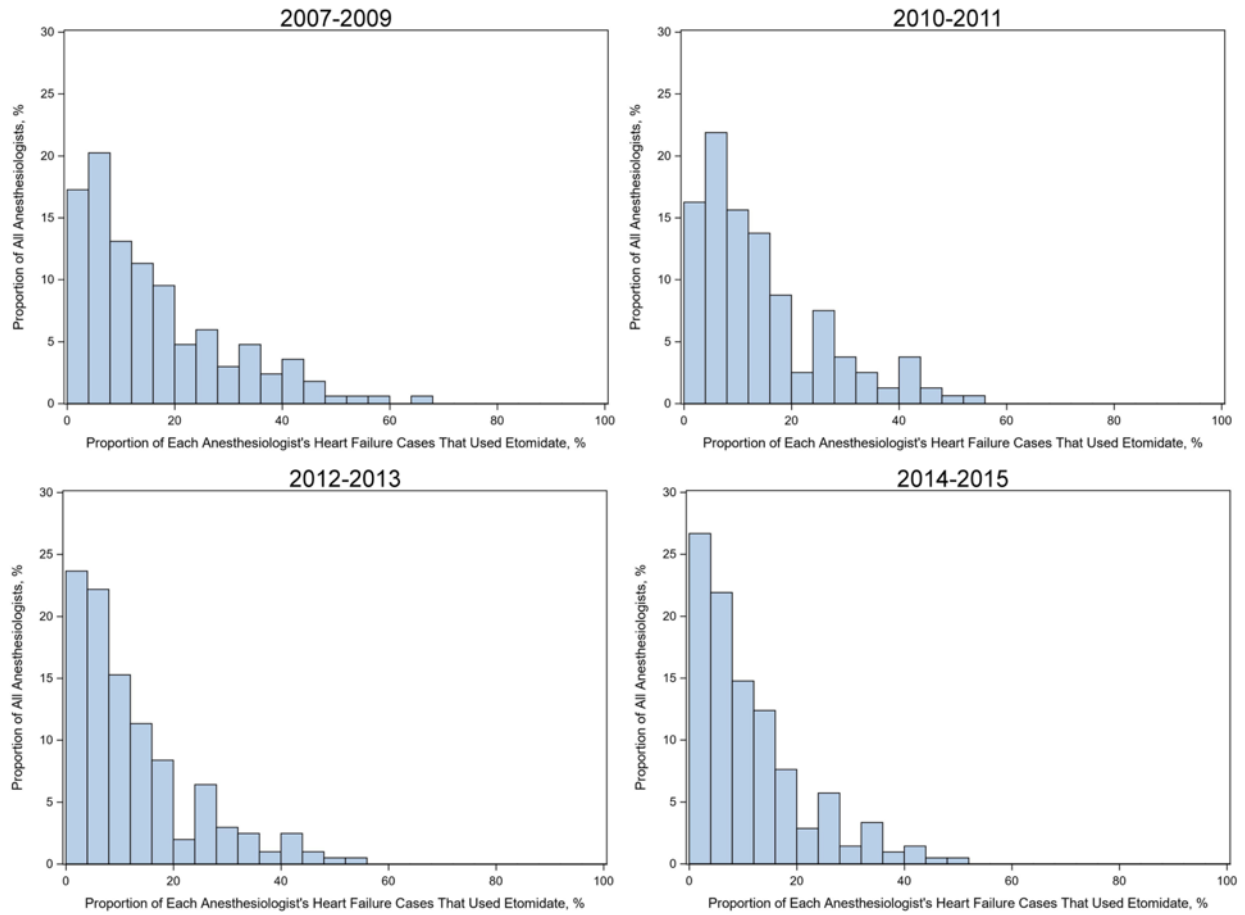

### References

1. Brookhart MA, Rassen JA, Schneeweiss S. Instrumental variable methods in comparative safety and effectiveness research. *Pharmacoepidemiol Drug Saf.* 2010;19(6):537-554.
2. Yeh RW, Vasaiwala S, Forman DE, Silbaugh TS, Zelevinski K, Lovett A, et al. Instrumental variable analysis to compare effectiveness of stents in the extremely elderly. *Circ Cardiovasc Qual Outcomes.* 2014;7(1):118-124.
3. Iwashyna TJ, Kennedy EH. Instrumental variable analyses. Exploiting natural randomness to understand causal mechanisms. *Annals of the American Thoracic Society.* 2013;10(3):255-260.
4. Secemsky EA, Kirtane A, Bangalore S, Jovin IS, Shah RM, Ferro EG, et al. Use and Effectiveness of Bivalirudin Versus Unfractionated Heparin for Percutaneous Coronary Intervention Among Patients With ST-Segment Elevation Myocardial Infarction in the United States. *JACC Cardiovasc Interv.* 2016;9(23):2376-2386.
